# Supplementary material for: Neutrophil to Lymphocyte Ratio as a Predictive Biomarker of Dementia: Findings from a Prospective Cohort Study in Individuals with Mild Cognitive Impairment
Source: Research Square preprint supplement (doi:10.21203/rs.3.rs-7332317/v1), 2025-09-24
Supplement: Supplementary file 1 [file 881b2f42fac640ffad0fd494.docx]

**e-Table 1. Results from the ROC analysis**.

| **Cutpoint** | **Sensitivity (%)** | **Specificity (%)** | **PPV (%)** | **NPV (%)** | **Youden index** |
| --- | --- | --- | --- | --- | --- |
| 1.18 | 100.0 | 3.9 | 44.9 | 100 | 0.04 |
| 1.47 | 97.5 | 27.5 | 51.3 | 93.3 | 0.25 |
| 2.0 | 77.5 | 51.0 | 55.4 | 74.3 | 0.28 |
| 2.25 | 75.0 | 66.7 | 63.8 | 77.3 | 0.42 |
| 2.5 | 57.5 | 78.4 | 67.7 | 70.2 | 0.36 |
| 3.0 | 45.0 | 86.3 | 72.0 | 66.7 | 0.31 |
| 3.64 | 30.0 | 94.1 | 80.0 | 63.2 | 0.24 |
| 5.29 | 2.5 | 96.1 | 33.3 | 55.7 | 0.01 |

A range of NLR cut-off values derived from the sample distribution including the mean (2.5), the median (2.25), and values corresponding to ±1 (3.65, 1.47) and ±2 SD (5.29, 1.18) from the mean, have been examined. In addition, cut-off values (2.0, 3.0) that have been proposed in previous studies have been investigated. For each cut-off value, sensitivity, specificity, positive predictive value [PPV], negative predictive value [NPV], and Youden index have been reported.

**eTable 2.** **Demographic, clinical, cognitive, anthropometric, functional and laboratory features in the total cohort and in the two subgroups according to NLR group (literature based NLR threshold 2.5)**

|  | **High NLR group (≥ 2.5)**  **(n=34)** | **Low NLR group (< 2.5)**  **(n=57)** | **p** |
| --- | --- | --- | --- |
| ***Demographic and clinical features at baseline*** |  |  |  |
| Age at baseline evaluation (years, mean ± sd) | 76.6±4.8 | 76.0±5.0 | 0.593 |
| BMI (kg/m2, mean ± sd) | 25.5±3.5 | 26.7±4.0 | 0.170 |
| Female gender (n, %) | 9 (26.5) | 37 (64.9) | <0.001 |
| Number of comorbidities (mean ± sd) | 4.6±1.9 | 5.0±2.5 | 0.429 |
| Number of chronic medications  (mean ± sd) | 5.1±2.3 | 5.0±3.0 | 0.836 |
| Smoke habits, (n, %)   - Active smoker - Ex-smoker - Never smoker | 1 (2.9)  18 (52.9)  15 (44.1) | 7 (12.3)  25 (43.9)  25 (43.9) | 0.289 |
| Amnesic MCI | 30 (88.2) | 40 (70.1) | 0.071 |
| Diabetes (yes), (n, %) | 5 (14.7) | 11 (19.3) | 0.578 |
| Cardiovascular diseases* (yes), n (%) | 29 (85.3) | 46 (80.7) | 0.578 |
| ADL (mean ± sd) | 5.6±0.5 | 5.7±0.5 | 0.522 |
| IADL (mean ± sd) | 7.7±1.0 | 7.7±0.3 | 0.158 |
| SPPB (mean ± sd) | 10.0±1.6 | 9.7±2.2 | 0.431 |
| GDS (mean ± sd) | 3.1±2.3 | 3.3±2.7 | 0.737 |
| Converters | 23 (67.6) | 17 (29.8) | <0.001 |
| ***Main laboratory parameters*** |  |  |  |
| Haemoglobin (g/dl) | 14.3±1.3 | 13.6±1.3 | 0.020 |
| Platelet (109/l) | 222.7±61.1 | 239.6±63.3 | 0.221 |
| Neutrophils (109/l) | 5.2±1.3 | 3.77±1.0 | <0.001 |
| Lymphocytes (109/l) | 1.5±0.4 | 2.1±0.6 | <0.001 |
| NLR | 3.6±0.9 | 1.8±0.4 | <0.001 |

**eFigure 1. ROC Curve of NLR for prediciting incident dementia**

**
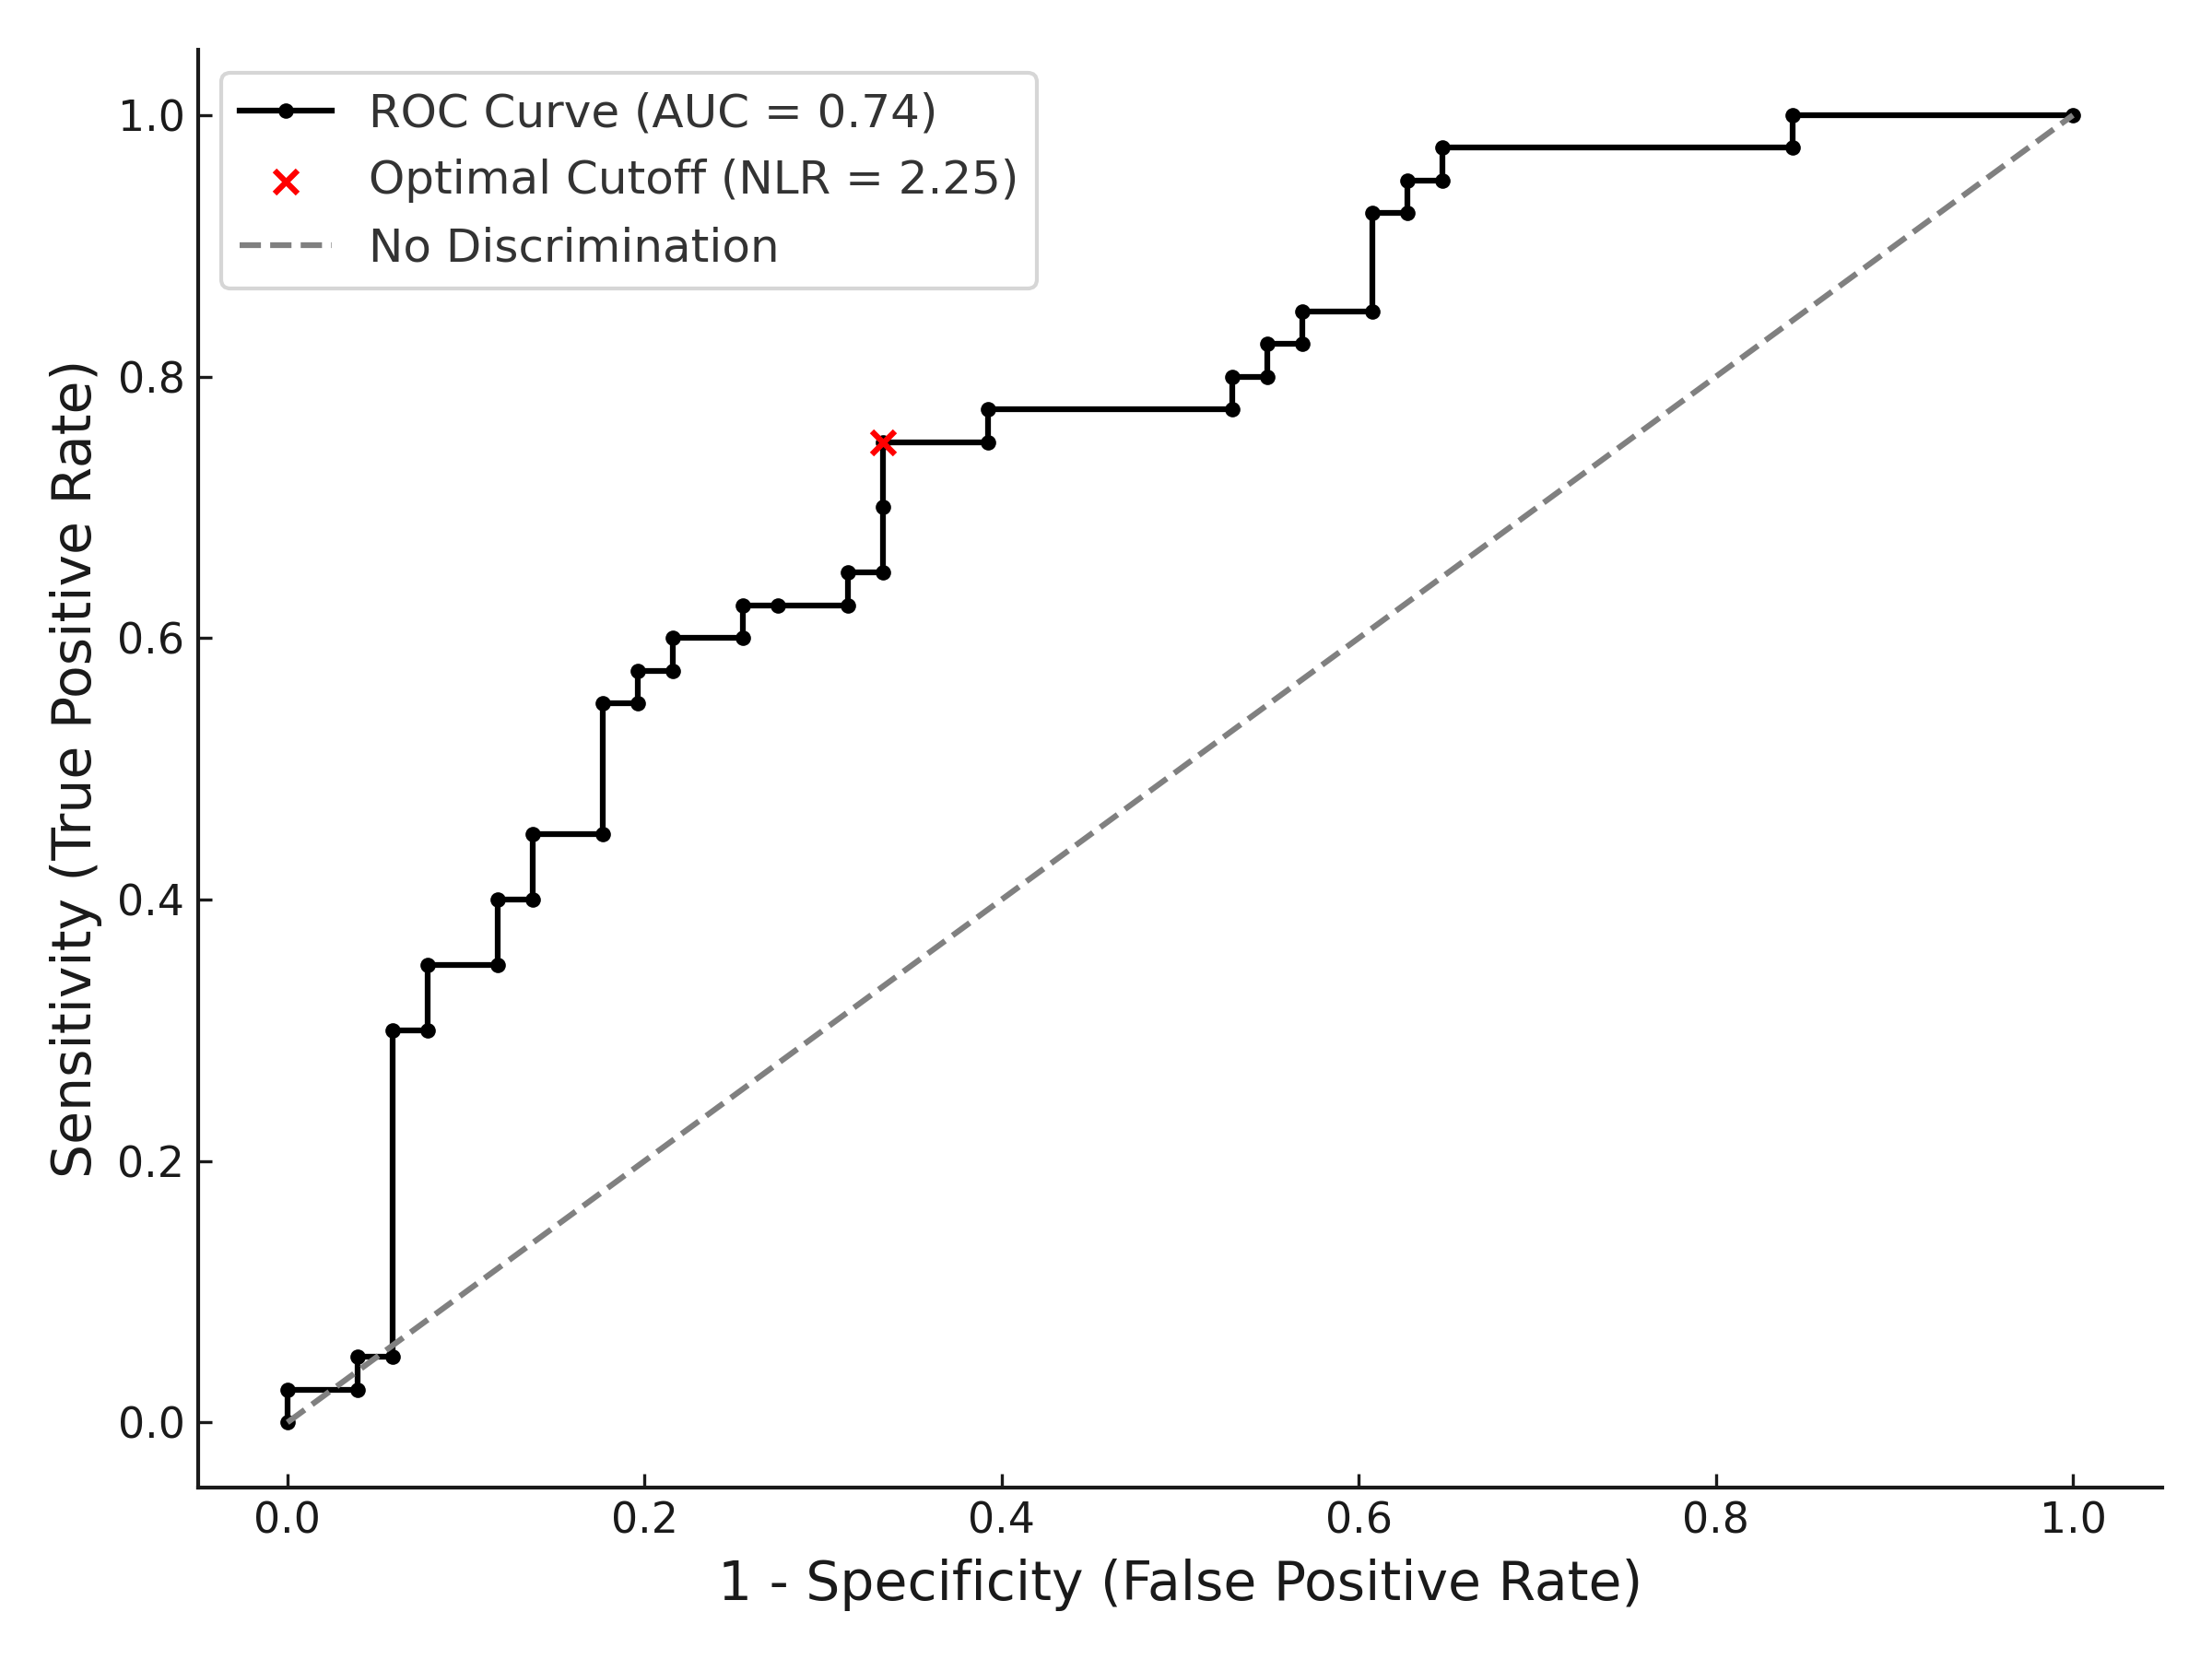
**
